# Supplementary material for: Graphene-based nitrogen-doped carbon sandwich nanosheets: a new capacitive process controlled anode material for high-performance sodium-ion batteries
Source: Royal Society of Chemistry journal article supplement (doi:10.1039/c6ta02139e), 2016-01-01
Supplement: c6ta02139e1.pdf [file c6ta02139e1.pdf]

## Electronic Supplementary Information

### Graphene-based Nitrogen-doped Carbon Sandwich Nanosheets: New Capacitive Process Controlled Anode Material for High-performance Sodium-ion Batteries

Dongdong Li<sup>† a,b</sup>, Lei Zhang<sup>† a,b</sup>, Hongbin Chen<sup>a</sup>, Jun Wang<sup>a</sup>, Liang-xin Ding<sup>\*,a</sup>, Suqing Wang<sup>a</sup>,  
Peter J. Ashman<sup>b</sup>, and Haihui Wang<sup>\*,a,b</sup>

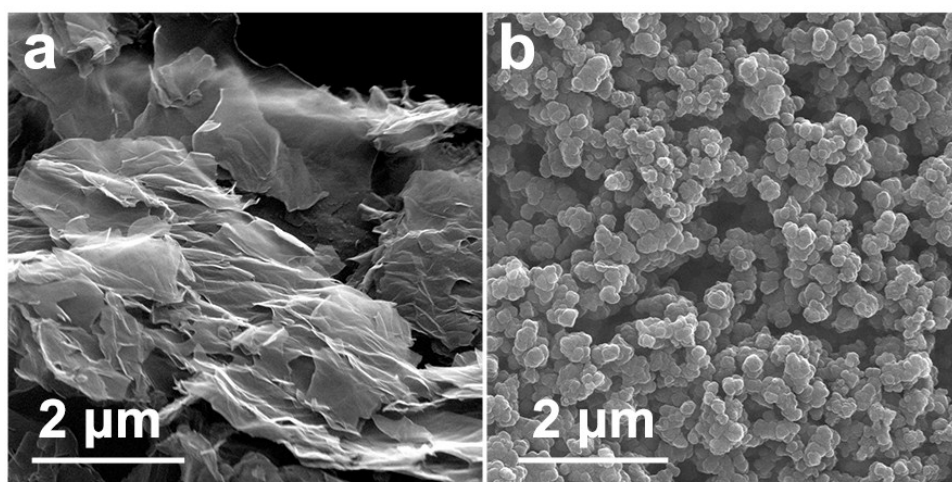

**Fig. S1** SEM images of G (a) and NC (b).

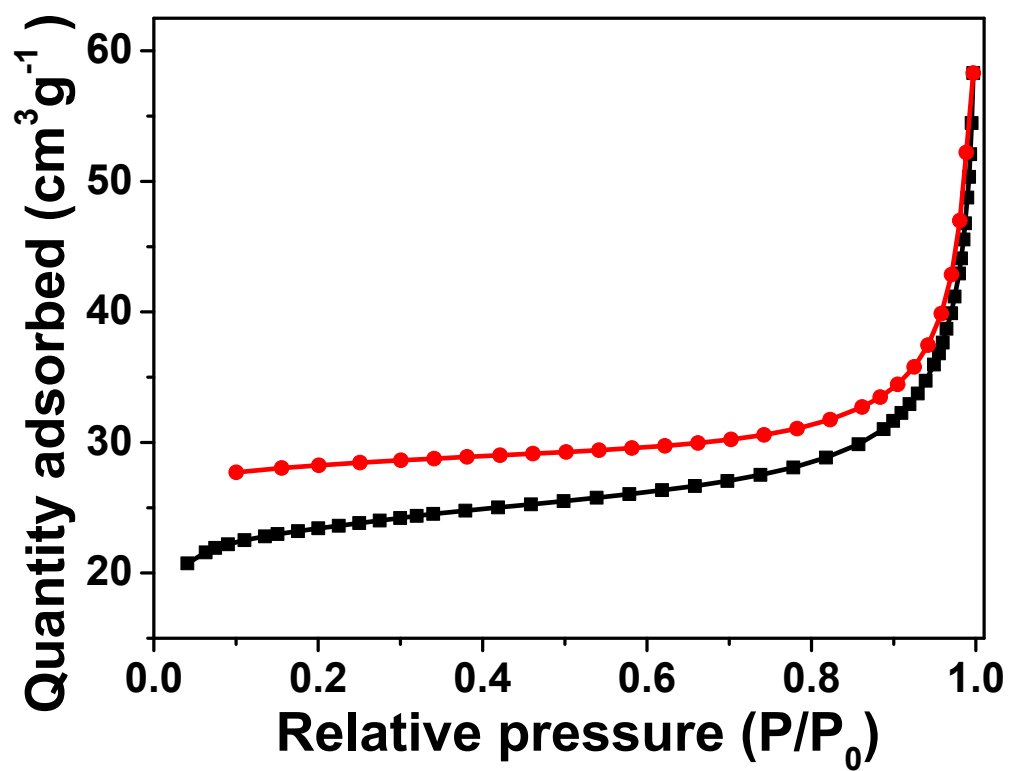

**Fig. S2** N<sub>2</sub> adsorption-desorption isotherms of NC.

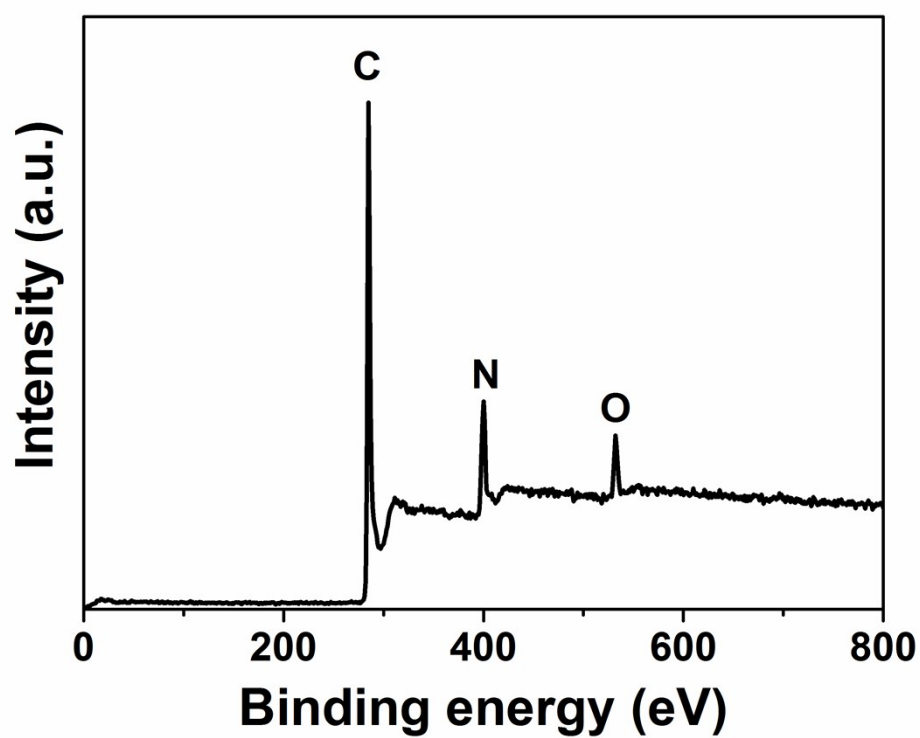

**Fig. S3** XPS survey spectrum of G-NCs-5.

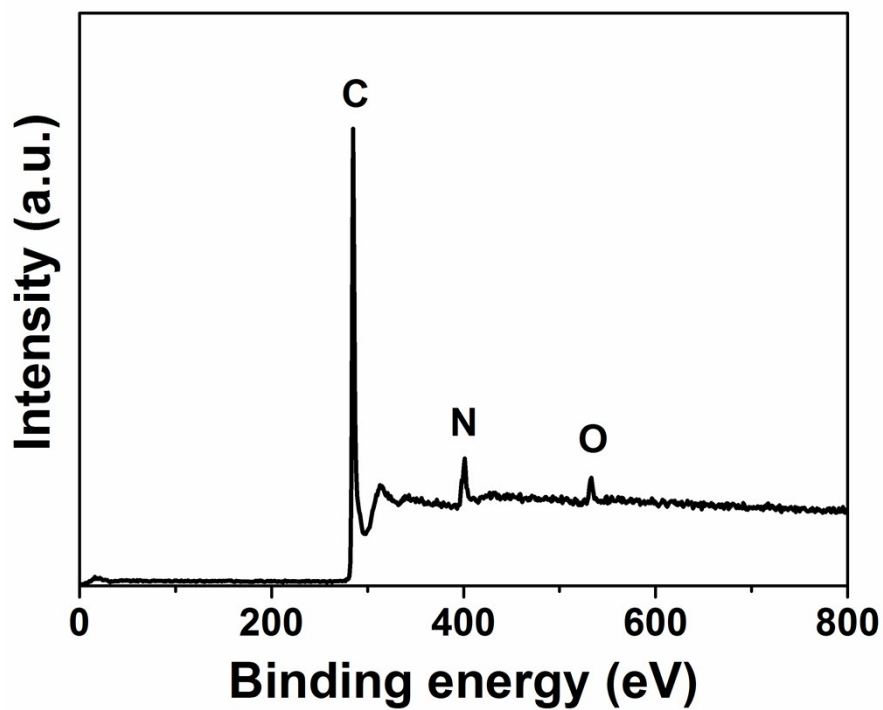

**Fig. S4** XPS survey spectrum of G-NCs-9.

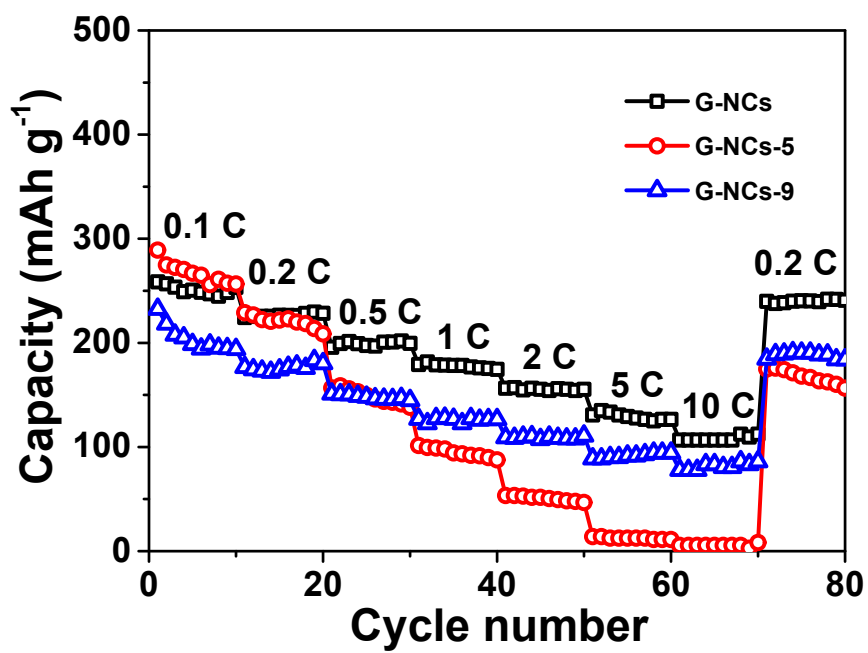

**Fig. S5** Rate capability of G-NCs, G-NCs-5 and G-NCs-9 between 0.01 and 3 V.

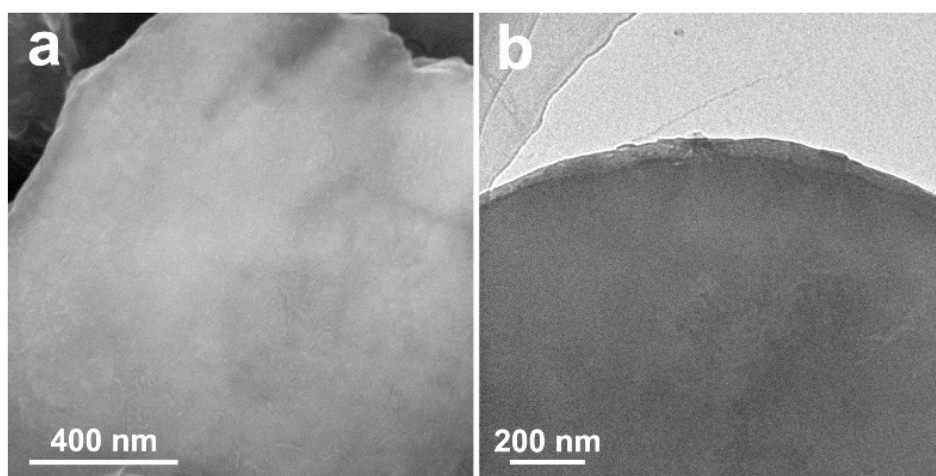

**Fig. S6** SEM (a) and TEM (b) images of G-NCs electrode after 50 cycles.

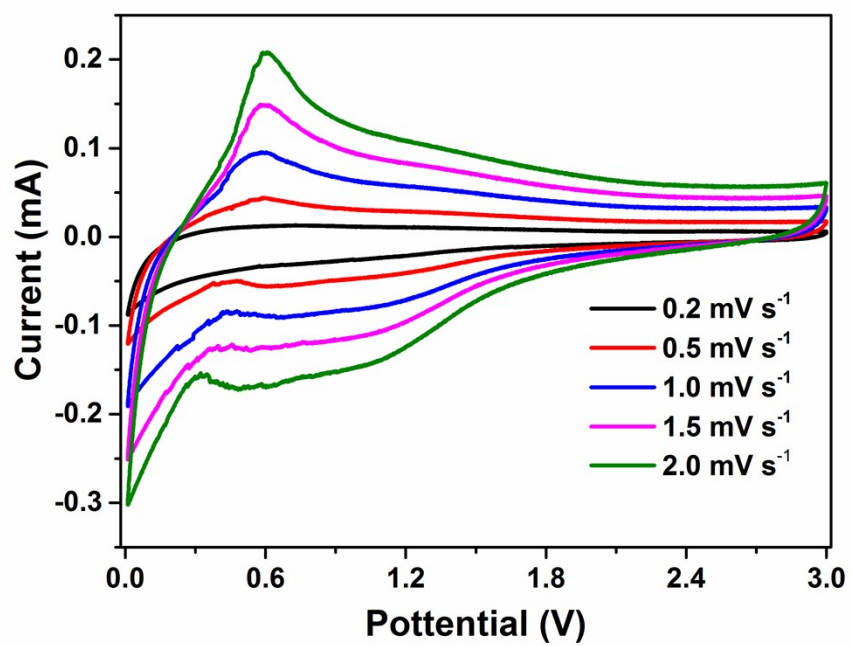

**Fig. S7** CV curves of G electrode at different sweep rates.

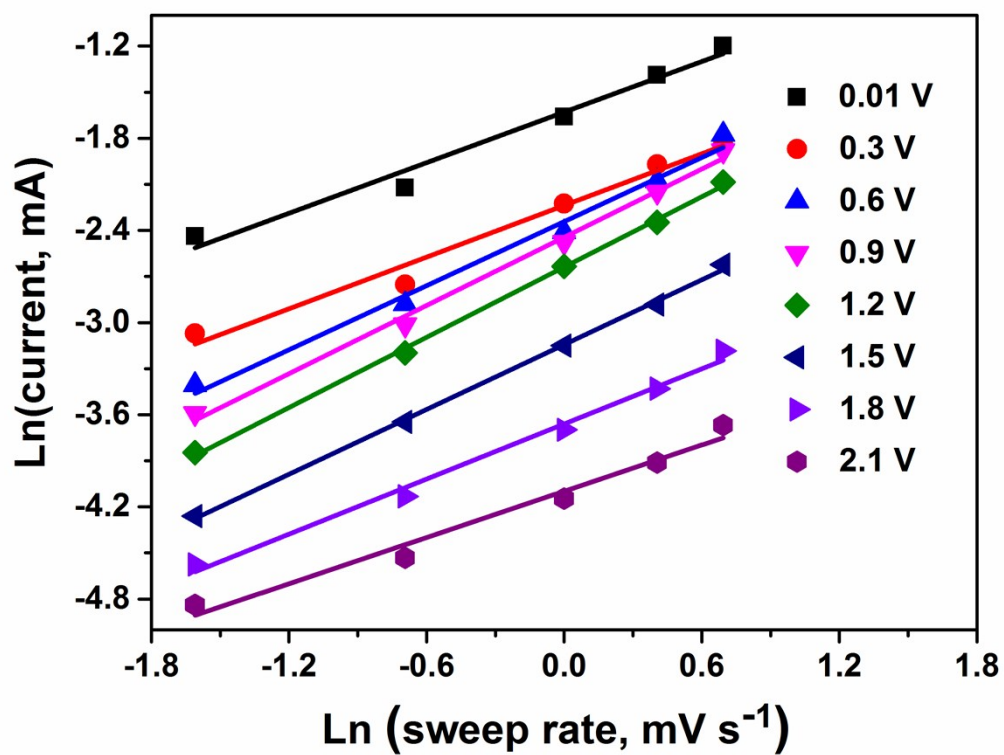

**Fig. S8** Linear relationships between logarithm currents  $\text{Ln}(i)$  and logarithm sweep rate  $\text{Ln}(v)$  of G CV curves.

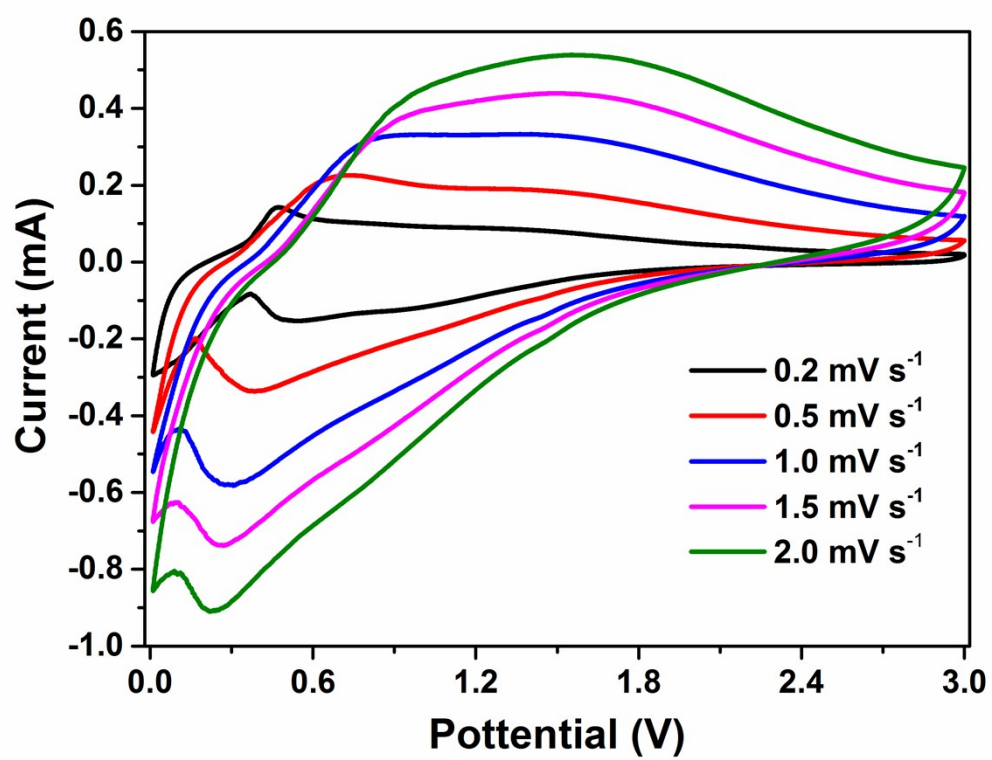

**Fig. S9** CV curves of NC electrode at different sweep rates.



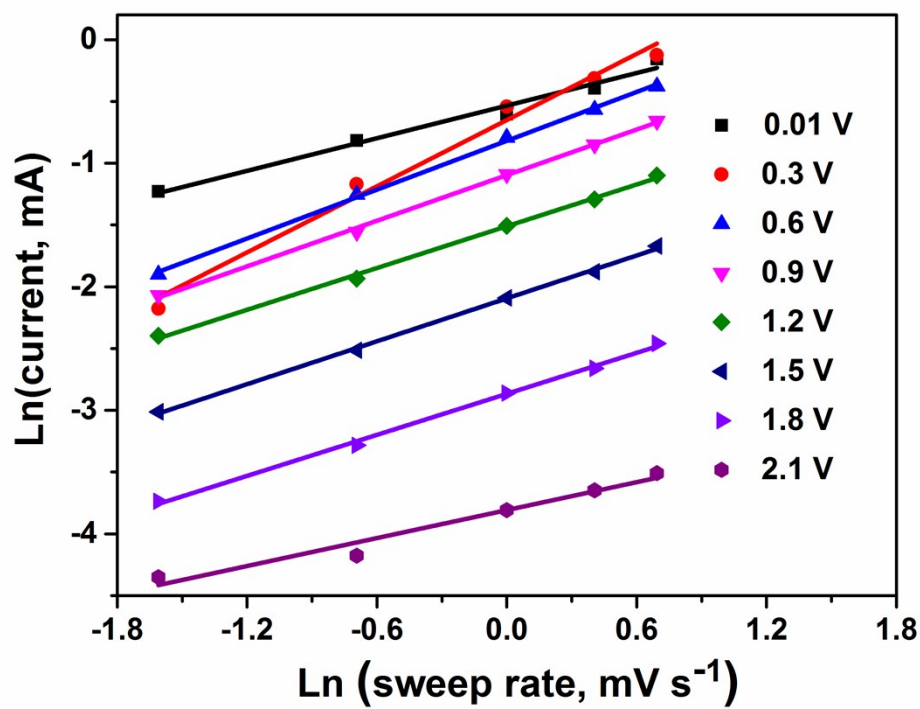

**Fig. S10** Linear relationships between logarithm currents  $\text{Ln}(i)$  and logarithm sweep rate  $\text{Ln}(v)$  of NC CV curves.
